# Supplementary material for: A general single-pot heating method for morphology, size and luminescence-controllable synthesis of colloidal ZnO nanocrystals
Source: Royal Society of Chemistry journal article supplement (doi:10.1039/c3nr02571c), 2013-01-01
Supplement: c3nr02571c.pdf [file c3nr02571c.pdf]

# A General Single-Pot Heating Method for Morphology, Size and Luminescence-Controllable Synthesis of Colloidal ZnO Nanocrystals

Xin Liu and Mark T. Swihart\*

Department of Chemical and Biological Engineering, University at Buffalo (SUNY), Buffalo, NY 14260, USA

\*Address Correspondence to swihart@buffalo.edu

## Supporting Information:

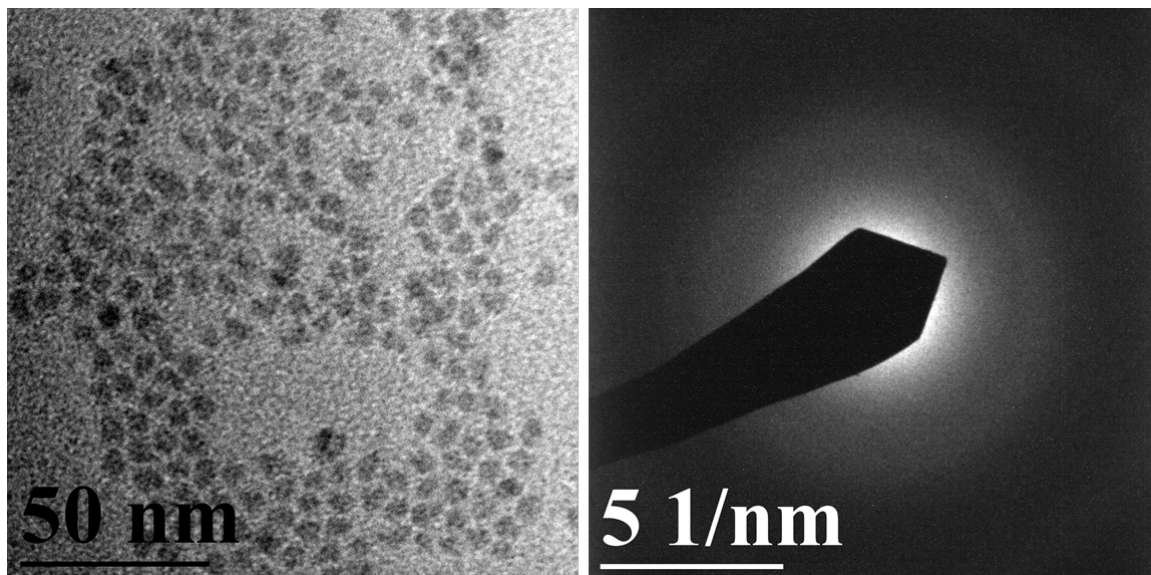

**Figure S1.** TEM image (left panel) showing quasi-spherical ZnO NPs synthesized in the presence of TOPO, benzyl ether and hexadecanediol. Selected-area electron diffraction (SAED, right panel) showed that these ZnO NPs had poor crystallinity.

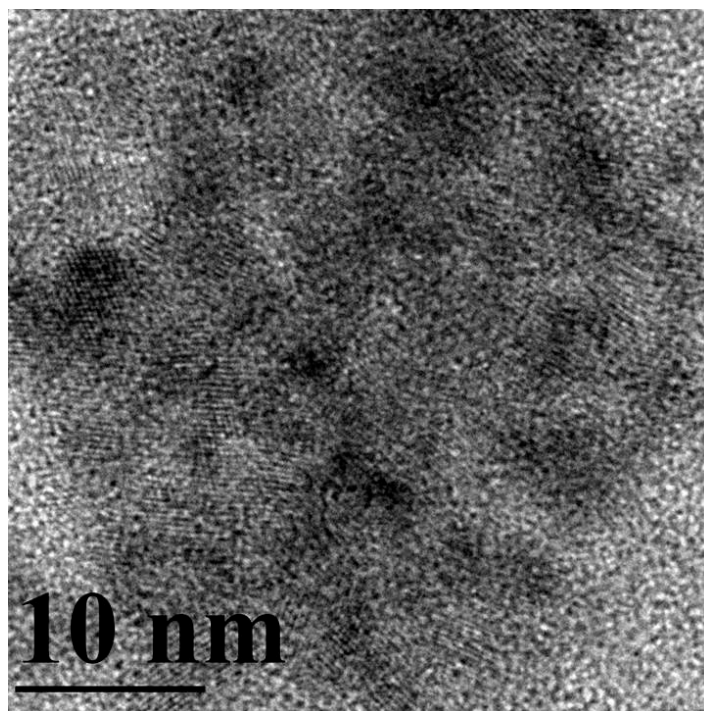

**Figure S2.** HRTEM image showing that the ZnO NPs with pinecone morphology were composed of small ZnO nanocrystals.

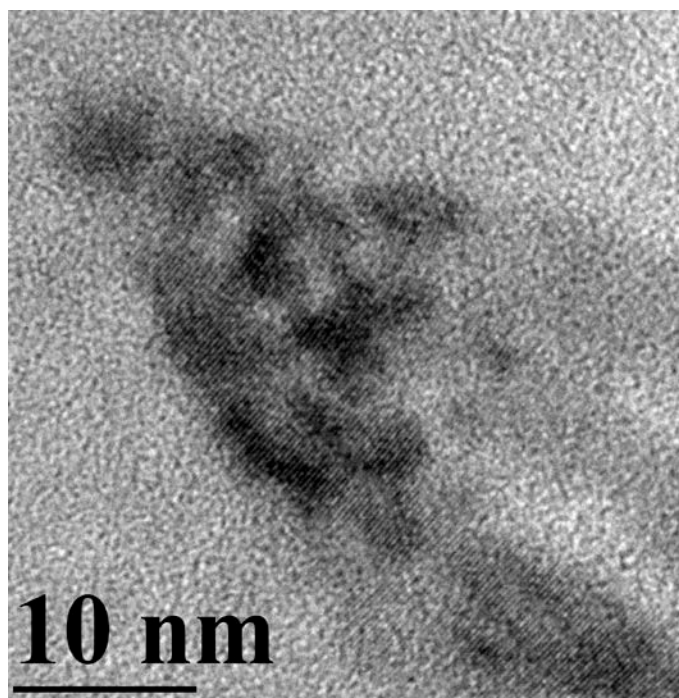

**Figure S3.** HRTEM image showing dendritic ZnO NCs synthesized by thermolysis of 300 mg  $\text{Zn}(\text{acac})_2$  in the presence of 2.2 g TOPO, 7 mL benzyl ether and 736 mg octadecanol at 290 °C

### *Synthesis of ZnO NPs using only oleylamine as ligand*

150 mg  $\text{Zn}(\text{acac})_2$ , 2.625 mL oleylamine, 7 mL benzyl ether and 367 mg hexadecanediol were mixed together. The mixture was heated to 250 °C and kept at this temperature for 1hr.

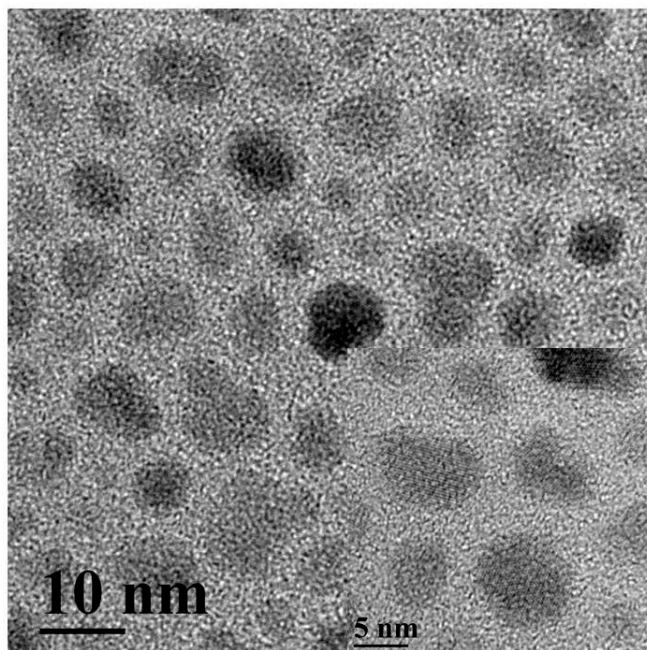

**Figure S4.** TEM and HRTEM (inset) of ZnO NPs synthesized using only OAm as ligand.

### *Synthesis of ZnO NPs using only dodecylamine as ligand*

150 mg  $\text{Zn}(\text{acac})_2$  precursor was mixed with 738 mg dodecylamine, 367 mg hexadecanediol and 7 ml benzyl ether. The solution was heated to 295 °C and kept at this temperature for 60 min.

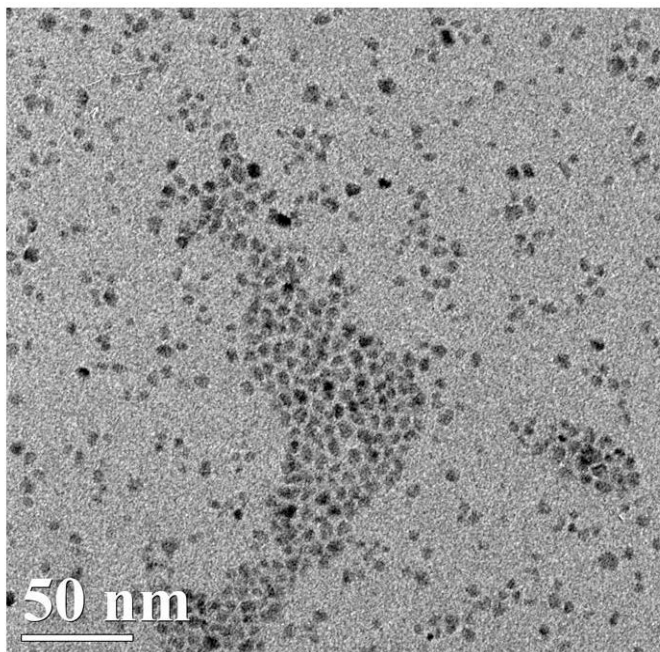

**Figure S5.** TEM of ZnO NPs synthesized using only dodecylamine as ligand.

***Synthesis of ZnO NPs using TOPO and OAm as the ligands***

150 mg  $\text{Zn}(\text{acac})_2$  precursor was mixed with 1.55 g TOPO, 2.5 ml OAm and 735 mg hexadecanediol. The solution was heated to 205 °C and kept at this temperature for 30 min.

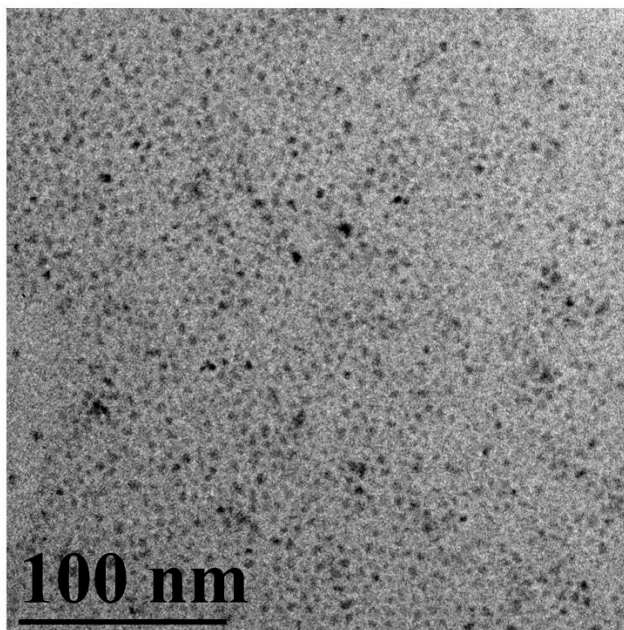

**Figure S6.** TEM of ZnO NPs synthesized using TOPO and OAm as ligands.
